# Supplementary material for: Thalamic white matter macrostructure and subnuclei volumes in Parkinson’s disease depression
Source: bioRxiv or medRxiv preprint supplement (doi:10.1101/2021.05.07.21256793), 2021-05-14
Supplement: Supplementary file [file media-1.pdf]

## **Supplementary Material**

### **Title**

Thalamic white matter macrostructure and subnuclei volumes in Parkinson's disease depression

### **Authors**

Bhome R<sup>1</sup>, Zarkali A<sup>1</sup>, Cole JH<sup>1,2</sup>, Weil RS<sup>1,3,4</sup>

| Supplementary Table 1. Association between baseline thalamic nuclei volumes and HADS depression score |                                    |                    |              |                      |                                    |                    |               |                      |
|-------------------------------------------------------------------------------------------------------|------------------------------------|--------------------|--------------|----------------------|------------------------------------|--------------------|---------------|----------------------|
| Nuclei                                                                                                | Left Thalamus                      |                    |              |                      | Right Thalamus                     |                    |               |                      |
|                                                                                                       | Baseline Volume (mm <sup>3</sup> ) | Adjusted beta (SE) | 95% CI       | p value <sup>a</sup> | Baseline Volume (mm <sup>3</sup> ) | Adjusted beta (SE) | 95% CI        | p value <sup>a</sup> |
| <b>Anterior group</b>                                                                                 |                                    |                    |              |                      |                                    |                    |               |                      |
| AV                                                                                                    | 126.76 (15.77)                     | 0.11 (0.49)        | -0.86 – 1.07 | 0.83                 | 141.07 (18.03)                     | -0.17 (0.61)       | -1.36 – 1.03  | 0.79                 |
| <b>Lateral group</b>                                                                                  |                                    |                    |              |                      |                                    |                    |               |                      |
| LD                                                                                                    | 27.33 (7.29)                       | 0.05 (0.27)        | -0.49 – 0.58 | 0.87                 | 26.20 (5.76)                       | 0.30 (0.21)        | -0.11 – 0.71  | 0.16                 |
| LP                                                                                                    | 122.09 (15.51)                     | -0.27 (0.48)       | -1.21 – 0.66 | 0.57                 | 109.67 (13.66)                     | 0.58 (0.42)        | -0.25 – 1.41  | 0.17                 |
| <b>Ventral group</b>                                                                                  |                                    |                    |              |                      |                                    |                    |               |                      |
| VA                                                                                                    | 381.10 (46.16)                     | -0.43 (1.13)       | -2.66 – 1.79 | 0.70                 | 392.75 (46.23)                     | -2.07 (1.21)       | -4.43 – 0.29  | 0.09                 |
| VAmc                                                                                                  | 27.91 (3.56)                       | -0.09 (0.10)       | -0.28 – 0.10 | 0.35                 | 29.35 (3.68)                       | -0.12 (0.10)       | -0.32 – 0.07  | 0.22                 |
| VLa                                                                                                   | 594.93 (69.07)                     | -1.71 (1.69)       | -5.02 – 1.60 | 0.31                 | 616.26 (69.72)                     | -2.99 (1.80)       | -6.52 – 0.54  | 0.10                 |
| VLp                                                                                                   | 772.62 (84.59)                     | -2.91 (2.25)       | -7.33 – 1.50 | 0.20                 | 793.23 (86.38)                     | -3.07 (2.27)       | -7.52 – 1.37  | 0.18                 |
| VPL                                                                                                   | 800.84 (95.13)                     | -3.44 (2.65)       | -8.63 – 1.75 | 0.19                 | 807.80 (99.60)                     | -1.77 (2.74)       | -7.13 – 3.59  | 0.52                 |
| VM                                                                                                    | 18.94 (2.35)                       | -0.05 (0.07)       | -0.18 – 0.09 | 0.51                 | 19.62 (2.65)                       | -0.04 (0.08)       | -0.18 – 0.11  | 0.64                 |
| <b>Intralaminar group</b>                                                                             |                                    |                    |              |                      |                                    |                    |               |                      |
| CeM                                                                                                   | 58.50 (8.40)                       | -0.16 (0.28)       | -0.71 – 0.40 | 0.58                 | 62.14 (8.92)                       | -0.33 (0.30)       | -0.92 – 0.26  | 0.27                 |
| CL                                                                                                    | 36.53 (6.40)                       | 0.28 (0.23)        | -0.17 – 0.73 | 0.22                 | 37.08 (5.02)                       | 0.19 (0.18)        | -0.16 – 0.54  | 0.29                 |
| Pc                                                                                                    | 3.06 (0.48)                        | -0.01 (0.01)       | -0.04 – 0.02 | 0.42                 | 3.15 (0.51)                        | -0.03 (0.02)       | -0.06 – 0.004 | 0.10                 |
| CM                                                                                                    | 241.14 (28.54)                     | -0.04 (0.02)       | -0.05 – 0.04 | 0.87                 | 241.29 (27.40)                     | -0.53 (0.76)       | -2.00 – 0.96  | 0.49                 |
| Pf                                                                                                    | 53.49 (6.58)                       | 0.15 (0.19)        | -0.23 – 0.52 | 0.44                 | 55.24 (6.05)                       | 0.15 (0.17)        | -0.19 – 0.49  | 0.39                 |
| <b>Medial group</b>                                                                                   |                                    |                    |              |                      |                                    |                    |               |                      |
| Pt                                                                                                    | 6.80 (0.79)                        | -0.004 (0.02)      | -0.05 – 0.04 | 0.87                 | 6.63 (0.69)                        | -0.001 (0.02)      | -0.04 – 0.04  | 0.94                 |
| MV-re                                                                                                 | 9.63 (1.85)                        | -0.02 (0.06)       | -0.15 – 0.10 | 0.74                 | 9.81 (2.04)                        | -0.06 (0.07)       | -0.20 – 0.08  | 0.40                 |
| MDm                                                                                                   | 624.67 (82.33)                     | -4.63 (2.42)       | -9.38 – 0.12 | 0.06                 | 649.59 (82.40)                     | -3.21 (2.42)       | -7.95 – 1.54  | 0.19                 |
| MDI                                                                                                   | 245.00 (27.60)                     | -1.46 (0.80)       | -3.02 – 0.11 | 0.07                 | 260.49 (25.22)                     | -0.82 (0.71)       | -2.20 – 0.56  | 0.25                 |
| <b>Posterior group</b>                                                                                |                                    |                    |              |                      |                                    |                    |               |                      |
| LGN                                                                                                   | 158.63 (27.79)                     | -1.32 (0.80)       | -2.88 – 0.24 | 0.10                 | 170.08 (27.59)                     | -0.20 (0.80)       | -1.77 – 1.37  | 0.80                 |
| MGN                                                                                                   | 114.02 (18.71)                     | -0.69 (0.60)       | -1.87 – 0.49 | 0.25                 | 114.23 (18.05)                     | -0.82 (0.52)       | -1.83 – 0.20  | 0.12                 |
| L-SG                                                                                                  | 24.69 (5.15)                       | -0.05 (0.17)       | -0.38 – 0.28 | 0.77                 | 23.78 (5.18)                       | 0.05 (0.16)        | -0.27 – 0.36  | 0.78                 |
| PuA                                                                                                   | 194.63 (21.69)                     | -0.29 (0.57)       | -1.41 – 0.83 | 0.61                 | 214.48 (23.29)                     | -0.77 (0.62)       | -1.99 – 0.45  | 0.21                 |

|     |                 |              |              |      |                 |              |              |      |
|-----|-----------------|--------------|--------------|------|-----------------|--------------|--------------|------|
| PuM | 939.30 (105.19) | -3.05 (3.10) | -9.13 – 3.03 | 0.33 | 979.63 (106.99) | -3.28 (3.19) | -9.53 – 2.97 | 0.30 |
| PuL | 183.23 (30.12)  | -0.16 (0.95) | -2.02 – 1.71 | 0.87 | 205.28 (31.97)  | -0.79 (1.00) | -2.75 – 1.17 | 0.43 |
| PuI | 171.55 (23.62)  | -0.61 (0.69) | -1.97 – 0.76 | 0.38 | 189.12 (23.49)  | -0.27 (0.73) | -1.69 – 1.16 | 0.72 |

**Anterior nuclei:** (AV= anteroventral);

**Lateral nuclei:** (LD= laterodorsal, LP= lateral posterior);

**Ventral nuclei:** (VA= ventral anterior, Vamc,= ventral anterior magnocellular , VL<sub>a</sub>= ventral lateral anterior, VL<sub>p</sub>= ventral lateral posterior, VPL= ventral posterolateral, VM= ventromedial);

**Intralaminar nuclei:** (CeM= central medial, CL= central lateral, Pc=paracentral, CM= centromedian Pf= parafascicular);

**Medial nuclei:** (Pt= paratenial, MV-re= reuniens (medial ventral), MD<sub>m</sub>= mediodorsal medial magnocellular, MD<sub>l</sub>= mediodorsal lateral parvocellular)

**Posterior nuclei:** (LGN=lateral geniculate, MGN= medical geniculate, L-SG= limitans (suprageniculate), PuA= pulvinar anterior, PuM= pulvinar medial, PuL= pulvinar lateral, PuI= pulvinar inferior).

<sup>a</sup>P values were analysed by a general linear model corrected by age, gender, total intracranial volume at baseline

There were no significant associations at baseline

| <b>Supplementary Table 2. Characteristics of PD participants taking and not taking antidepressant medication</b>                                                                                                                                                                                                                                                                                                     |                             |                                 |                        |
|----------------------------------------------------------------------------------------------------------------------------------------------------------------------------------------------------------------------------------------------------------------------------------------------------------------------------------------------------------------------------------------------------------------------|-----------------------------|---------------------------------|------------------------|
| <b>Attribute</b>                                                                                                                                                                                                                                                                                                                                                                                                     | <b>Antidepressant (n=9)</b> | <b>No antidepressant (n=67)</b> | <b>Statistic</b>       |
| <b>Demographics</b>                                                                                                                                                                                                                                                                                                                                                                                                  |                             |                                 |                        |
| Age, y                                                                                                                                                                                                                                                                                                                                                                                                               | 60.56 (6.47)                | 65.12 (8.01)                    | t=-1.62, p=0.11        |
| Male, n (%)                                                                                                                                                                                                                                                                                                                                                                                                          | 3 (33%)                     | 67 (88)                         | $\chi^2=1.11$ , p=0.29 |
| <b>Mood (HADS)<sup>a</sup></b>                                                                                                                                                                                                                                                                                                                                                                                       |                             |                                 |                        |
| Depression score                                                                                                                                                                                                                                                                                                                                                                                                     | 5.39 (4.38)                 | 3.92 (2.99)                     | U=359.0, p=0.36        |
| Anxiety score                                                                                                                                                                                                                                                                                                                                                                                                        | 8.94 (5.90)                 | 5.01 (2.96)                     | U= 469.5, p=0.007      |
| <b>Cognitive testing</b>                                                                                                                                                                                                                                                                                                                                                                                             |                             |                                 |                        |
| MMSE                                                                                                                                                                                                                                                                                                                                                                                                                 | 29.00 (1.15)                | 29.01 (1.18)                    | U=299.0, p=0.97        |
| MoCA                                                                                                                                                                                                                                                                                                                                                                                                                 | 28.11 (1.91)                | 27.93 (2.23)                    | U=314.5, p=0.84        |
| GNT                                                                                                                                                                                                                                                                                                                                                                                                                  | 24.67 (2.94)                | 24.04 (2.52)                    | U=356.0, p=0.38        |
| JLO <sup>b</sup>                                                                                                                                                                                                                                                                                                                                                                                                     | 24.22 (3.74)                | 24.90 (3.95)                    | t=-0.49, p=0.63        |
| <b>Disease specific measures</b>                                                                                                                                                                                                                                                                                                                                                                                     |                             |                                 |                        |
| Disease duration, y                                                                                                                                                                                                                                                                                                                                                                                                  | 3.56 (2.01)                 | 4.19 (2.53)                     | U=260.5, p=0.51        |
| LEDD                                                                                                                                                                                                                                                                                                                                                                                                                 | 420.56 (178.43)             | 428.83 (224.61)                 | t=-0.10, p=0.92        |
| UPDRS                                                                                                                                                                                                                                                                                                                                                                                                                | 46.89 (13.94)               | 45.73 (21.78)                   | U=329.5, p=0.66        |
| UPDRS Motor Score                                                                                                                                                                                                                                                                                                                                                                                                    | 25.67 (10.55)               | 23.07 (12.52)                   | U=352.5, p=0.42        |
| RBDSQ                                                                                                                                                                                                                                                                                                                                                                                                                | 5.33 (3.02)                 | 4.00 (2.07)                     | U=370.5, p=0.27        |
| UM-PDHQ                                                                                                                                                                                                                                                                                                                                                                                                              | 2.22 (3.29)                 | 0.48 (1.44)                     | U=372.0, p=0.08        |
| Abbreviations: HADS = Hospital Anxiety and Depression Scale; MMSE = Mini-Mental State Examination; MoCA = Montreal Cognitive Assessment; GNT = Graded Naming Test; = Judgment of Line Orientation; LEDD = Total levodopa equivalent dose; UPDRS = Unified Parkinson's Disease Rating Scale; RBDSQ = REM Sleep Behaviour Disorder Screening Questionnaire; UM-PDHQ = University of Miami Hallucinations Questionnaire |                             |                                 |                        |
| All data shown are mean (SD) except gender.                                                                                                                                                                                                                                                                                                                                                                          |                             |                                 |                        |
| <sup>a</sup> Average HADS depression and anxiety scores derived from baseline and follow up scores                                                                                                                                                                                                                                                                                                                   |                             |                                 |                        |
| <sup>b</sup> No antidepressant (n=66)                                                                                                                                                                                                                                                                                                                                                                                |                             |                                 |                        |

| Supplementary Table 3. Association between baseline thalamic nuclei FC and HADS depression score |                |                    |                |                      |                |                    |                |                      |
|--------------------------------------------------------------------------------------------------|----------------|--------------------|----------------|----------------------|----------------|--------------------|----------------|----------------------|
| Nuclei                                                                                           | Left Thalamus  |                    |                |                      | Right Thalamus |                    |                |                      |
|                                                                                                  | Baseline FC    | Adjusted beta (SE) | 95% CI         | p value <sup>a</sup> | Baseline FC    | Adjusted beta (SE) | 95% CI         | p value <sup>a</sup> |
| <b>Anterior group</b>                                                                            |                |                    |                |                      |                |                    |                |                      |
| AV                                                                                               | 0.071 (0.025)  | -0.002 (0.001)     | -0.004 – 0.001 | 0.21                 | 0.078 (0.064)  | -0.002 (0.001)     | -0.004 – 0.001 | 0.18                 |
| <b>Lateral group</b>                                                                             |                |                    |                |                      |                |                    |                |                      |
| LD                                                                                               | 0.085 (0.065)  | -0.002 (0.001)     | -0.004 – 0.001 | 0.16                 | 0.083 (0.065)  | -0.002 (0.001)     | -0.004 – 0.001 | 0.16                 |
| LP                                                                                               | 0.016 (0.054)  | -0.000 (0.001)     | -0.003 – 0.003 | 0.79                 | 0.075 (0.063)  | -0.002 (0.001)     | -0.004 – 0.001 | 0.14                 |
| <b>Ventral group</b>                                                                             |                |                    |                |                      |                |                    |                |                      |
| VA                                                                                               | 0.070 (0.065)  | -0.001 (0.001)     | -0.004 – 0.001 | 0.35                 | 0.071 (0.066)  | -0.001 (0.001)     | -0.004 – 0.001 | 0.29                 |
| VAmc                                                                                             | 0.067 (0.059)  | -0.001 (0.001)     | -0.003 – 0.001 | 0.47                 | 0.072 (0.063)  | -0.001 (0.001)     | -0.004 – 0.001 | 0.34                 |
| VLa                                                                                              | 0.067 (0.061)  | -0.001 (0.001)     | -0.003 – 0.002 | 0.56                 | 0.066 (0.062)  | -0.001 (0.001)     | -0.003 – 0.002 | 0.51                 |
| VLp                                                                                              | 0.066 (0.061)  | -0.001 (0.001)     | -0.003 – 0.002 | 0.56                 | 0.067 (0.061)  | -0.001 (0.001)     | -0.003 – 0.002 | 0.63                 |
| VPL                                                                                              | 0.069 (0.059)  | -0.001 (0.001)     | -0.003 – 0.002 | 0.60                 | 0.065 (0.058)  | -0.000 (0.001)     | -0.002 – 0.002 | 0.83                 |
| VM                                                                                               | -0.300 (0.247) | 0.002 (0.003)      | -0.008 – 0.012 | 0.66                 | -0.287 (0.250) | 0.003 (0.005)      | -0.007 – 0.012 | 0.55                 |
| <b>Intralaminar group</b>                                                                        |                |                    |                |                      |                |                    |                |                      |
| CeM                                                                                              | 0.065 (0.058)  | -0.001 (0.001)     | -0.003 – 0.002 | 0.56                 | 0.068 (0.057)  | -0.000 (0.001)     | -0.002 – 0.002 | 0.92                 |
| CL                                                                                               | 0.083 (0.065)  | -0.002 (0.001)     | -0.005 – 0.000 | 0.09                 | 0.085 (0.074)  | -0.003 (0.003)     | -0.009 – 0.002 | 0.24                 |
| Pc                                                                                               | -0.217 (0.180) | 0.004 (0.003)      | -0.003 – 0.010 | 0.29                 | -0.227 (0.144) | 0.004 (0.004)      | -0.003 – 0.011 | 0.27                 |
| CM                                                                                               | 0.070 (0.060)  | -0.001 (0.001)     | -0.003 – 0.001 | 0.39                 | 0.073 (0.060)  | -0.001 (0.001)     | -0.003 – 0.002 | 0.53                 |
| Pf                                                                                               | 0.062 (0.057)  | -0.001 (0.001)     | -0.003 – 0.002 | 0.62                 | 0.069 (0.057)  | -0.000 (0.001)     | -0.003 – 0.002 | 0.83                 |
| <b>Medial group</b>                                                                              |                |                    |                |                      |                |                    |                |                      |
| Pt                                                                                               | -0.217 (0.180) | 0.004 (0.003)      | -0.003 – 0.001 | 0.29                 | -0.227 (0.144) | 0.004 (0.004)      | -0.003 – 0.011 | 0.27                 |
| MV-re                                                                                            | 0.069 (0.059)  | -0.001 (0.001)     | -0.003 – 0.001 | 0.42                 | 0.074 (0.062)  | -0.001 (0.001)     | -0.004 – 0.001 | 0.30                 |
| MDm                                                                                              | 0.039 (0.065)  | -0.002 (0.001)     | -0.005 – 0.001 | 0.12                 | 0.039 (0.057)  | 0.000 (0.002)      | -0.003 – 0.003 | 0.92                 |
| MDI                                                                                              | 0.016 (0.059)  | -0.001 (0.001)     | -0.004 – 0.002 | 0.50                 | -0.007 (0.073) | -0.001 (0.001)     | -0.005 – 0.004 | 0.78                 |
| <b>Posterior group</b>                                                                           |                |                    |                |                      |                |                    |                |                      |
| LGN                                                                                              | 0.081 (0.066)  | -0.001 (0.001)     | -0.004 – 0.001 | 0.25                 | 0.074 (0.065)  | -0.002 (0.001)     | -0.004 – 0.001 | 0.16                 |
| MGN                                                                                              | 0.080 (0.063)  | -0.001 (0.001)     | -0.004 – 0.001 | 0.28                 | 0.077 (0.063)  | -0.001 (0.001)     | -0.004 – 0.001 | 0.24                 |
| L-SG                                                                                             | 0.069 (0.065)  | -0.002 (0.001)     | -0.005 – 0.000 | 0.09                 | 0.090 (0.066)  | -0.002 (0.001)     | -0.005 – 0.000 | 0.07                 |
| PuA                                                                                              | -0.016 (0.202) | -0.004 (0.005)     | -0.014 – 0.007 | 0.50                 | 0.047 (0.071)  | -0.002 (0.002)     | -0.006 – 0.001 | 0.15                 |
| PuM                                                                                              | 0.084 (0.066)  | -0.002 (0.001)     | -0.004 – 0.001 | 0.16                 | 0.080 (0.066)  | -0.002 (0.001)     | -0.004 – 0.001 | 0.14                 |

|     |               |                |                |      |               |                |                |      |
|-----|---------------|----------------|----------------|------|---------------|----------------|----------------|------|
| PuL | 0.076 (0.064) | -0.001 (0.001) | -0.003 – 0.001 | 0.39 | 0.072 (0.064) | -0.001 (0.001) | -0.004 – 0.001 | 0.35 |
| PuI | 0.083 (0.064) | -0.001 (0.001) | -0.004 – 0.001 | 0.25 | 0.081 (0.064) | -0.001 (0.001) | -0.004 – 0.001 | 0.23 |

**Anterior nuclei:** (AV= anteroventral);

**Lateral nuclei:** (LD= laterodorsal, LP= lateral posterior);

**Ventral nuclei:** (VA= ventral anterior, Vamc,= ventral anterior magnocellular , VLa= ventral lateral anterior, VLp= ventral lateral posterior, VPL= ventral posterolateral, VM= ventromedial);

**Intralaminar nuclei:** (CeM= central medial, CL= central lateral, Pc=paracentral, CM= centromedian Pf= parafascicular);

**Medial nuclei:** (Pt= paratenial, MV-re= reuniens (medial ventral), MDm= mediodorsal medial magnocellular, MDl= mediodorsal lateral parvocellular)

**Posterior nuclei:** (LGN=lateral geniculate, MGN= medial geniculate, L-SG= limitans (suprageniculate), PuA= pulvinar anterior, PuM= pulvinar medial, PuL= pulvinar lateral, PuI= pulvinar inferior).

<sup>a</sup>P values were analysed by a general linear model corrected by age, gender, total intracranial volume at baseline

There were no significant associations at baseline

| <b>Supplementary Table 4. Prediction of FC scores by average HADS depression score</b> |                                |                                        |                           |                            |                            |                                |                                        |                           |                            |                            |
|----------------------------------------------------------------------------------------|--------------------------------|----------------------------------------|---------------------------|----------------------------|----------------------------|--------------------------------|----------------------------------------|---------------------------|----------------------------|----------------------------|
| <b>Left Thalamus</b>                                                                   |                                |                                        |                           |                            |                            | <b>Right Thalamus</b>          |                                        |                           |                            |                            |
| <b>Nuclei</b>                                                                          | <b>Baseline FC<sup>a</sup></b> | <b>Longitudinal change<sup>a</sup></b> | <b>Adjusted beta (SE)</b> | <b>p value<sup>b</sup></b> | <b>q value<sup>c</sup></b> | <b>Baseline FC<sup>a</sup></b> | <b>Longitudinal change<sup>a</sup></b> | <b>Adjusted beta (SE)</b> | <b>p value<sup>b</sup></b> | <b>q value<sup>c</sup></b> |
| <b>Anterior group</b>                                                                  |                                |                                        |                           |                            |                            |                                |                                        |                           |                            |                            |
| AV                                                                                     | <b>0.071 (0.025)</b>           | <b>-0.197 (0.253)</b>                  | <b>-0.011 (0.005)</b>     | <b>0.018</b>               | <b>0.026</b>               | <b>0.078 (0.064)</b>           | <b>-0.199 (0.257)</b>                  | <b>-0.012 (0.005)</b>     | <b>0.014</b>               | <b>0.026</b>               |
| <b>Lateral group</b>                                                                   |                                |                                        |                           |                            |                            |                                |                                        |                           |                            |                            |
| LD                                                                                     | <b>0.085 (0.065)</b>           | <b>-0.198 (0.261)</b>                  | <b>-0.012 (0.005)</b>     | <b>0.015</b>               | <b>0.026</b>               | <b>0.083 (0.065)</b>           | <b>-0.199 (0.262)</b>                  | <b>-0.012 (0.005)</b>     | <b>0.013</b>               | <b>0.026</b>               |
| LP                                                                                     | <b>0.016 (0.054)</b>           | <b>-0.168 (0.236)</b>                  | <b>-0.012 (0.004)</b>     | <b>0.007</b>               | <b>0.026</b>               | <b>0.075 (0.063)</b>           | <b>-0.180 (0.257)</b>                  | <b>-0.012 (0.005)</b>     | <b>0.010</b>               | <b>0.026</b>               |
| <b>Ventral group</b>                                                                   |                                |                                        |                           |                            |                            |                                |                                        |                           |                            |                            |
| VA                                                                                     | <b>0.070 (0.065)</b>           | <b>-0.202 (0.258)</b>                  | <b>-0.011 (0.005)</b>     | <b>0.026</b>               | <b>0.029</b>               | <b>0.071 (0.066)</b>           | <b>-0.205 (0.259)</b>                  | <b>-0.011 (0.005)</b>     | <b>0.017</b>               | <b>0.026</b>               |
| VAmc                                                                                   | <b>0.067 (0.059)</b>           | <b>-0.196 (0.259)</b>                  | <b>-0.011 (0.005)</b>     | <b>0.018</b>               | <b>0.026</b>               | <b>0.072 (0.063)</b>           | <b>-0.206 (0.260)</b>                  | <b>-0.011 (0.005)</b>     | <b>0.017</b>               | <b>0.026</b>               |
| VLa                                                                                    | <b>0.067 (0.061)</b>           | <b>-0.202 (0.259)</b>                  | <b>-0.011 (0.005)</b>     | <b>0.028</b>               | <b>0.026</b>               | <b>0.066 (0.062)</b>           | <b>-0.206 (0.261)</b>                  | <b>-0.011 (0.005)</b>     | <b>0.020</b>               | <b>0.026</b>               |
| VLp                                                                                    | <b>0.066 (0.061)</b>           | <b>-0.202 (0.257)</b>                  | <b>-0.010 (0.005)</b>     | <b>0.030</b>               | <b>0.033</b>               | <b>0.067 (0.061)</b>           | <b>-0.205 (0.262)</b>                  | <b>-0.011 (0.005)</b>     | <b>0.021</b>               | <b>0.026</b>               |
| VPL                                                                                    | <b>0.069 (0.059)</b>           | <b>-0.200 (0.261)</b>                  | <b>-0.011 (0.005)</b>     | <b>0.025</b>               | <b>0.028</b>               | <b>0.065 (0.058)</b>           | <b>-0.202 (0.261)</b>                  | <b>-0.011 (0.005)</b>     | <b>0.021</b>               | <b>0.026</b>               |
| VM                                                                                     | <b>-0.300 (0.247)</b>          | <b>0.833 (1.064)</b>                   | <b>0.043 (0.020)</b>      | <b>0.031</b>               | <b>0.033</b>               | <b>-0.287 (0.250)</b>          | <b>0.834 (1.057)</b>                   | <b>0.044 (0.019)</b>      | <b>0.020</b>               | <b>0.026</b>               |
| <b>Intralaminar group</b>                                                              |                                |                                        |                           |                            |                            |                                |                                        |                           |                            |                            |
| CeM                                                                                    | <b>0.065 (0.058)</b>           | <b>-0.194 (0.258)</b>                  | <b>-0.011 (0.005)</b>     | <b>0.020</b>               | <b>0.026</b>               | <b>0.068 (0.057)</b>           | <b>-0.197 (0.260)</b>                  | <b>-0.011 (0.005)</b>     | <b>0.019</b>               | <b>0.026</b>               |
| CL                                                                                     | <b>0.083 (0.065)</b>           | <b>-0.194 (0.256)</b>                  | <b>-0.011 (0.005)</b>     | <b>0.014</b>               | <b>0.026</b>               | <b>0.085 (0.074)</b>           | <b>-0.205 (0.282)</b>                  | <b>-0.014 (0.006)</b>     | <b>0.017</b>               | <b>0.026</b>               |
| Pc                                                                                     | <b>-0.217 (0.180)</b>          | <b>0.585 (0.772)</b>                   | <b>0.034 (0.014)</b>      | <b>0.017</b>               | <b>0.026</b>               | <b>-0.227 (0.144)</b>          | <b>0.605 (0.803)</b>                   | <b>0.036 (0.015)</b>      | <b>0.014</b>               | <b>0.026</b>               |
| CM                                                                                     | <b>0.070 (0.060)</b>           | <b>-0.198 (0.260)</b>                  | <b>-0.011 (0.005)</b>     | <b>0.019</b>               | <b>0.026</b>               | <b>0.073 (0.060)</b>           | <b>-0.202 (0.262)</b>                  | <b>-0.011 (0.005)</b>     | <b>0.017</b>               | <b>0.026</b>               |
| Pf                                                                                     | <b>0.062 (0.057)</b>           | <b>-0.190 (0.256)</b>                  | <b>-0.011 (0.005)</b>     | <b>0.018</b>               | <b>0.026</b>               | <b>0.069 (0.057)</b>           | <b>-0.196 (0.260)</b>                  | <b>-0.011 (0.005)</b>     | <b>0.018</b>               | <b>0.026</b>               |
| <b>Medial group</b>                                                                    |                                |                                        |                           |                            |                            |                                |                                        |                           |                            |                            |
| Pt                                                                                     | -0.217 (0.180)                 | -0.217 (0.180)                         | 0.009 (0.005)             | 0.080                      | 0.083                      | -0.227 (0.144)                 | -0.227 (0.144)                         | 0.009 (0.006)             | 0.120                      | 0.12                       |
| MV-re                                                                                  | <b>0.069 (0.059)</b>           | <b>-0.196 (0.260)</b>                  | <b>-0.011 (0.005)</b>     | <b>0.017</b>               | <b>0.026</b>               | <b>0.074 (0.062)</b>           | <b>-0.202 (0.260)</b>                  | <b>-0.011 (0.005)</b>     | <b>0.016</b>               | <b>0.026</b>               |
| MDm                                                                                    | <b>0.039 (0.065)</b>           | <b>-0.168 (0.230)</b>                  | <b>-0.011 (0.004)</b>     | <b>0.010</b>               | <b>0.026</b>               | <b>0.039 (0.057)</b>           | <b>-0.177 (0.239)</b>                  | <b>-0.010 (0.005)</b>     | <b>0.020</b>               | <b>0.026</b>               |
| MDI                                                                                    | <b>0.016 (0.059)</b>           | <b>-0.161 (0.215)</b>                  | <b>-0.011 (0.004)</b>     | <b>0.012</b>               | <b>0.026</b>               | <b>-0.007 (0.073)</b>          | <b>-0.110 (0.202)</b>                  | <b>-0.010 (0.004)</b>     | <b>0.007</b>               | <b>0.026</b>               |
| <b>Posterior group</b>                                                                 |                                |                                        |                           |                            |                            |                                |                                        |                           |                            |                            |
| LGN                                                                                    | <b>0.081 (0.066)</b>           | <b>-0.207 (0.261)</b>                  | <b>-0.011 (0.005)</b>     | <b>0.022</b>               | <b>0.026</b>               | <b>0.074 (0.065)</b>           | <b>-0.199 (0.255)</b>                  | <b>-0.012 (0.005)</b>     | <b>0.013</b>               | <b>0.026</b>               |
| MGN                                                                                    | <b>0.080 (0.063)</b>           | <b>-0.200 (0.262)</b>                  | <b>-0.011 (0.005)</b>     | <b>0.018</b>               | <b>0.026</b>               | <b>0.077 (0.063)</b>           | <b>-0.199 (0.259)</b>                  | <b>-0.012 (0.005)</b>     | <b>0.015</b>               | <b>0.026</b>               |
| L-SG                                                                                   | <b>0.069 (0.065)</b>           | <b>-0.183 (0.248)</b>                  | <b>-0.011 (0.005)</b>     | <b>0.014</b>               | <b>0.026</b>               | <b>0.090 (0.066)</b>           | <b>-0.195 (0.265)</b>                  | <b>-0.012 (0.005)</b>     | <b>0.010</b>               | <b>0.026</b>               |
| PuA                                                                                    | -0.016 (0.202)                 | -0.160 (0.263)                         | -0.010 (0.006)            | 0.097                      | 0.099                      | <b>0.047 (0.071)</b>           | <b>-0.169 (0.256)</b>                  | <b>-0.012 (0.004)</b>     | <b>0.007</b>               | <b>0.026</b>               |
| PuM                                                                                    | <b>0.084 (0.066)</b>           | <b>-0.201 (0.261)</b>                  | <b>-0.011 (0.005)</b>     | <b>0.017</b>               | <b>0.026</b>               | <b>0.080 (0.066)</b>           | <b>-0.198 (0.260)</b>                  | <b>-0.012 (0.005)</b>     | <b>0.013</b>               | <b>0.026</b>               |

|     |                      |                       |                       |              |              |                      |                       |                       |              |              |
|-----|----------------------|-----------------------|-----------------------|--------------|--------------|----------------------|-----------------------|-----------------------|--------------|--------------|
| PuL | <b>0.076 (0.064)</b> | <b>-0.204 (0.261)</b> | <b>-0.011 (0.005)</b> | <b>0.025</b> | <b>0.028</b> | <b>0.072 (0.064)</b> | <b>-0.205 (0.261)</b> | <b>-0.011 (0.005)</b> | <b>0.018</b> | <b>0.026</b> |
| PuI | <b>0.083 (0.064)</b> | <b>-0.205 (0.265)</b> | <b>-0.012 (0.005)</b> | <b>0.017</b> | <b>0.026</b> | <b>0.081 (0.064)</b> | <b>-0.204 (0.263)</b> | <b>-0.012 (0.005)</b> | <b>0.014</b> | <b>0.026</b> |

**Anterior nuclei:** (AV= anteroventral);

**Lateral nuclei:** (LD= laterodorsal, LP= lateral posterior);

**Ventral nuclei:** (VA= ventral anterior, Vamc,= ventral anterior magnocellular , VL<sub>a</sub>= ventral lateral anterior, VL<sub>p</sub>= ventral lateral posterior, VPL= ventral posterolateral, VM= ventromedial);

**Intralaminar nuclei:** (CeM= central medial, CL= central lateral, Pc=paracentral, CM= centromedian Pf= parafascicular);

**Medial nuclei:** (Pt= paratenial, MV-re= reuniens (medial ventral), MD<sub>m</sub>= mediodorsal medial magnocellular, MD<sub>l</sub>= mediodorsal lateral parvocellular)

**Posterior nuclei:** (LGN=lateral geniculate, MGN= medial geniculate, L-SG= limitans (suprageniculate), PuA= pulvinar anterior, PuM= pulvinar medial, PuL= pulvinar lateral, PuI= pulvinar inferior).

<sup>a</sup> For each nucleus, baseline FC and longitudinal change are presented as mean (SD).

<sup>b</sup>p values were analysed by a GLMM corrected by age, gender total intracranial volume, time with participant as a random effect.

<sup>c</sup>q values were calculated following FDR correction using the Benjamini-Hochberg method.

In **bold** results showing FDR-corrected statistically significant associations
